# Supplementary figures and images for: Are Roma People Descended from the Punjab Region of Pakistan: A Y-Chromosomal Perspective
Source: MDPI journal article supplement (doi:10.3390/genes13030532), 2022-03-17

Tree scale: 0.1

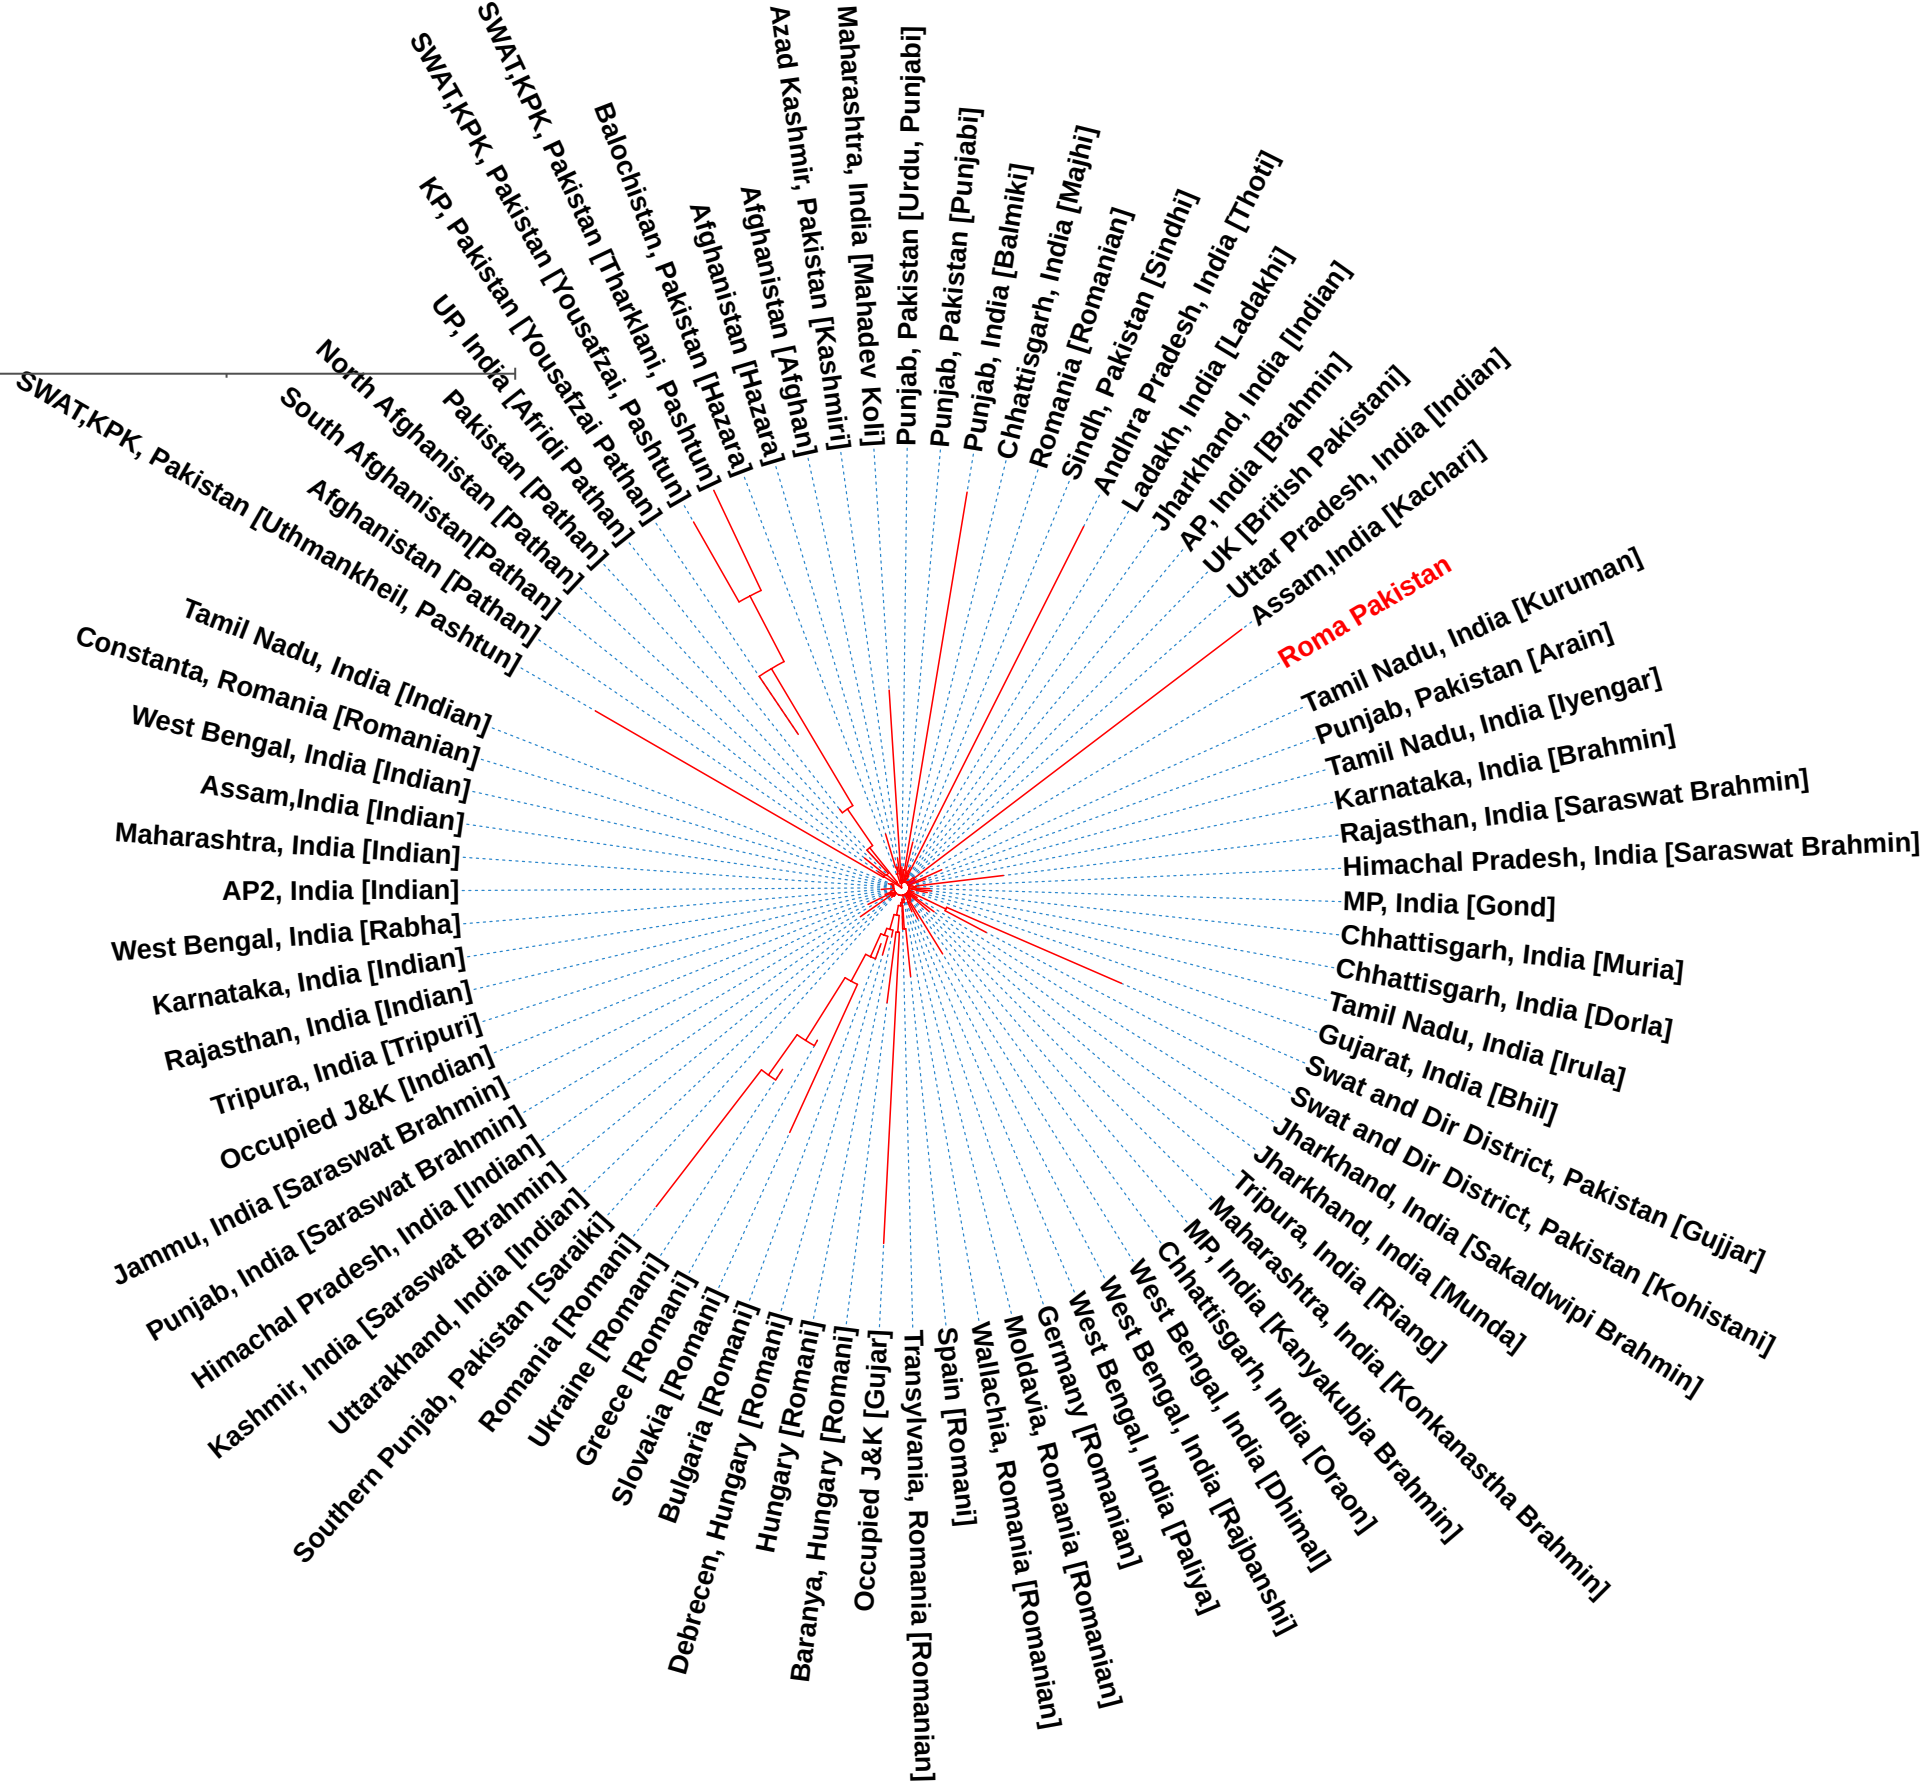

Supplement: s1 [file s1]
